# Supplementary material for: Systems biological understanding of the regulatory network and the possible therapeutic strategies for vascular calcification
Source: Royal Society of Chemistry journal article supplement (doi:10.1039/c6mb00557h), 2016-10-05
Supplement: c6mb00557h2.xlsx [file c6mb00557h2.xlsx]

## Sheet: Sheet1
ID	adj.P.Val	P.Value	t	B	logFC	Gene.symbol	Gene.title
204415_at	0.00408	1.42e-06	14.4	5.57132	1.2	IFI6	interferon, alpha-inducible protein 6
225681_at	0.00127	1.5e-07	19.7	7.00591	0.912	CTHRC1	collagen triple helix repeat containing 1
229479_at	0.00617	3.95e-06	12.4	4.79331	0.909
218723_s_at	0.00732	6.82e-06	11.4	4.35084	0.859	RGCC	regulator of cell cycle
205907_s_at	0.0136	3.04e-05	9.19	3.05255	0.834	OMD	osteomodulin
226930_at	0.00769	8.16e-06	11.2	4.20187	0.814	FNDC1	fibronectin type III domain containing 1
215388_s_at	0.00174	2.54e-07	18.3	6.7037	0.801	CFHR1///CFH	complement factor H-related 1///complement factor H
202450_s_at	0.00281	7.7e-07	15.7	5.9985	0.776	CTSK	cathepsin K
202411_at	0.01872	5.72e-05	8.36	2.47196	0.748	IFI27	interferon, alpha-inducible protein 27
224840_at	0.0022	5.63e-07	16.4	6.20733	0.724	FKBP5	FK506 binding protein 5
206336_at	0.02096	7.48e-05	8.03	2.2201	0.714	CXCL6	chemokine (C-X-C motif) ligand 6
229554_at	0.00828	1.09e-05	10.7	3.95494	0.709
207118_s_at	0.00828	1.1e-05	10.7	3.95113	0.685	MMP23A///MMP23B	matrix metallopeptidase 23A (pseudogene)///matrix metallopeptidase 23B
201149_s_at	0.00376	1.22e-06	14.7	5.67718	0.667	TIMP3	TIMP metallopeptidase inhibitor 3
205542_at	0.01391	3.36e-05	9.06	2.96259	0.643	STEAP1	six transmembrane epithelial antigen of the prostate 1
212950_at	0.00611	3.69e-06	12.5	4.84776	0.632	GPR116	G protein-coupled receptor 116
204439_at	0.02026	6.86e-05	8.14	2.30109	0.625	IFI44L	interferon-induced protein 44-like
202283_at	0.00783	8.74e-06	11	4.14427	0.615	SERPINF1	serpin peptidase inhibitor, clade F (alpha-2 antiplasmin, pigment epithelium derived factor), member 1
202948_at	0.00732	6.72e-06	11.5	4.3627	0.608	IL1R1	interleukin 1 receptor, type I
201141_at	0.00783	8.88e-06	11	4.13105	0.605	GPNMB	glycoprotein (transmembrane) nmb
201744_s_at	0.01404	3.42e-05	9.03	2.94752	0.595	LUM	lumican
221900_at	0.00611	3.68e-06	12.5	4.84952	0.587	COL8A2	collagen, type VIII, alpha 2
206100_at	0.00802	1.02e-05	10.8	4.01188	0.586	CPM	carboxypeptidase M
213170_at	0.00599	3.05e-06	12.9	4.99601	0.585	GPX7	glutathione peroxidase 7
201288_at	0.00875	1.24e-05	10.5	3.8493	0.585	ARHGDIB	Rho GDP dissociation inhibitor (GDI) beta
205885_s_at	0.00963	1.46e-05	10.2	3.70348	0.585	ITGA4	integrin, alpha 4 (antigen CD49D, alpha 4 subunit of VLA-4 receptor)
209596_at	0.01525	4.15e-05	8.77	2.76793	0.581	MXRA5	matrix-remodelling associated 5
218638_s_at	0.01002	1.56e-05	10.1	3.64871	0.573	SPON2	spondin 2, extracellular matrix protein
213068_at	0.01128	2.14e-05	9.69	3.36975	0.563	DPT	dermatopontin
218162_at	0.01759	5.12e-05	8.5	2.57553	0.556	OLFML3	olfactomedin-like 3
205884_at	0.00599	3.18e-06	12.8	4.96422	0.546	ITGA4	integrin, alpha 4 (antigen CD49D, alpha 4 subunit of VLA-4 receptor)
224856_at	0.00611	3.42e-06	12.6	4.90754	0.545	FKBP5	FK506 binding protein 5
228640_at	0.01274	2.59e-05	9.42	3.19889	0.539	PCDH7	protocadherin 7
212543_at	0.02049	7.12e-05	8.09	2.26616	0.531	AIM1	absent in melanoma 1
202409_at	0.01079	1.85e-05	9.89	3.49559	0.525	INS-IGF2///IGF2	INS-IGF2 readthrough///insulin-like growth factor 2
239260_at	0.00617	3.84e-06	12.4	4.81665	0.523	CORIN	corin, serine peptidase
1554062_at	0.00732	6.52e-06	11.5	4.38797	0.521	XG	Xg blood group
228708_at	0.007	5.69e-06	11.8	4.50038	0.51	RAB27B	RAB27B, member RAS oncogene family
205908_s_at	0.01904	6.11e-05	8.28	2.40983	0.509	OMD	osteomodulin
225239_at	0.00917	1.34e-05	10.4	3.778	0.506
1555812_a_at	0.00706	6.02e-06	11.7	4.4533	0.505	ARHGDIB	Rho GDP dissociation inhibitor (GDI) beta
222877_at	0.02069	7.29e-05	8.06	2.24412	0.497
1552289_a_at	0.02185	7.95e-05	7.95	2.1615	0.493	CILP2	cartilage intermediate layer protein 2
211564_s_at	0.00963	1.46e-05	10.2	3.7078	0.49	PDLIM4	PDZ and LIM domain 4
204285_s_at	0.007	5.29e-06	11.9	4.55878	0.489	PMAIP1	phorbol-12-myristate-13-acetate-induced protein 1
213800_at	0.01405	3.59e-05	8.97	2.90233	0.488	CFH	complement factor H
202888_s_at	0.00764	7.83e-06	11.2	4.23666	0.487	ANPEP	alanyl (membrane) aminopeptidase
209758_s_at	0.007	5.76e-06	11.7	4.48938	0.477	MFAP5	microfibrillar associated protein 5
212192_at	0.01405	3.58e-05	8.97	2.90551	0.467	KCTD12	potassium channel tetramerization domain containing 12
211709_s_at	0.0079	9.22e-06	11	4.09895	0.466	CLEC11A	C-type lectin domain family 11, member A
213226_at	0.0176	5.15e-05	8.5	2.56907	0.457	CCNA2	cyclin A2
209004_s_at	0.00783	8.67e-06	11.1	4.1508	0.449	FBXL5	F-box and leucine-rich repeat protein 5
202037_s_at	0.00917	1.33e-05	10.4	3.78417	0.447	SFRP1	secreted frizzled-related protein 1
212188_at	0.00981	1.51e-05	10.2	3.67735	0.437	KCTD12	potassium channel tetramerization domain containing 12
206631_at	0.01203	2.35e-05	9.55	3.28372	0.425	PTGER2	prostaglandin E receptor 2 (subtype EP2), 53kDa
234989_at	0.01133	2.18e-05	9.66	3.35408	0.422	NEAT1	nuclear paraspeckle assembly transcript 1 (non-protein coding)
225162_at	0.0136	2.9e-05	9.26	3.09671	0.42	SH3D19	SH3 domain containing 19
226504_at	0.01426	3.73e-05	8.92	2.86695	0.42	FAM109B	family with sequence similarity 109, member B
229055_at	0.01618	4.5e-05	8.67	2.69462	0.413	GPR68	G protein-coupled receptor 68
205422_s_at	0.01376	3.25e-05	9.1	2.9935	0.408	ITGBL1	integrin, beta-like 1 (with EGF-like repeat domains)
203828_s_at	0.01929	6.3e-05	8.24	2.38056	0.407	IL32	interleukin 32
228080_at	0.01139	2.21e-05	9.64	3.34029	0.394	LAYN	layilin
208850_s_at	0.01771	5.28e-05	8.46	2.54639	0.393	THY1	Thy-1 cell surface antigen
204709_s_at	0.01903	5.88e-05	8.33	2.44641	0.365	KIF23	kinesin family member 23
206091_at	0.02069	7.33e-05	8.05	2.23821	0.364	MATN3	matrilin 3
227006_at	0.01832	5.53e-05	8.41	2.50331	0.343	PPP1R14A	protein phosphatase 1, regulatory (inhibitor) subunit 14A
203088_at	0.02002	6.74e-05	8.16	2.31809	0.343	FBLN5	fibulin 5
230309_at	0.01904	6.13e-05	8.28	2.40708	0.337	BHMT2	betaine--homocysteine S-methyltransferase 2
210609_s_at	0.02069	7.33e-05	8.05	2.23898	0.327	TP53I3	tumor protein p53 inducible protein 3
1555788_a_at	0.02044	7.07e-05	-8.1	2.27324	-0.328	TRIB3	tribbles pseudokinase 3
226835_s_at	0.02069	7.34e-05	-8.05	2.23719	-0.328	ZFAS1	ZNFX1 antisense RNA 1
212155_at	0.01929	6.35e-05	-8.23	2.37347	-0.334	RNF187	ring finger protein 187
226438_at	0.02039	7.01e-05	-8.11	2.28061	-0.336	SNTB1	syntrophin, beta 1 (dystrophin-associated protein A1, 59kDa, basic component 1)
210432_s_at	0.02153	7.78e-05	-7.98	2.18225	-0.336	SCN3A	sodium channel, voltage-gated, type III, alpha subunit
208308_s_at	0.01903	5.98e-05	-8.31	2.42944	-0.338	GPI	glucose-6-phosphate isomerase
236115_at	0.02108	7.56e-05	-8.02	2.20994	-0.339	HTR7P1	5-hydroxytryptamine (serotonin) receptor 7 pseudogene 1
225807_at	0.01903	6.02e-05	-8.3	2.42335	-0.34	AJUBA	ajuba LIM protein
213942_at	0.01929	6.32e-05	-8.24	2.37844	-0.345	MEGF6	multiple EGF-like-domains 6
212558_at	0.01765	5.21e-05	-8.48	2.55868	-0.346	SPRY1	sprouty homolog 1, antagonist of FGF signaling (Drosophila)
216331_at	0.02002	6.71e-05	-8.16	2.32194	-0.346	ITGA7	integrin, alpha 7
236089_at	0.02031	6.95e-05	-8.12	2.28929	-0.351
205952_at	0.01685	4.87e-05	-8.57	2.62119	-0.354	KCNK3	potassium channel, subfamily K, member 3
241809_at	0.01765	5.23e-05	-8.48	2.55492	-0.357	FAM212B	family with sequence similarity 212, member B
209676_at	0.02269	8.36e-05	-7.89	2.11442	-0.366	TFPI	tissue factor pathway inhibitor (lipoprotein-associated coagulation inhibitor)
233234_at	0.02153	7.8e-05	-7.98	2.1803	-0.369	KCTD16	potassium channel tetramerization domain containing 16
209017_s_at	0.01903	5.9e-05	-8.32	2.44176	-0.37	LONP1	lon peptidase 1, mitochondrial
205127_at	0.02002	6.73e-05	-8.16	2.31945	-0.373	PTGS1	prostaglandin-endoperoxide synthase 1 (prostaglandin G/H synthase and cyclooxygenase)
1559506_x_at	0.01371	3.19e-05	-9.13	3.00831	-0.374	MIR137HG	MIR137 host gene (non-protein coding)
225096_at	0.01405	3.58e-05	-8.97	2.90554	-0.379	COPRS	coordinator of PRMT5, differentiation stimulator
216241_s_at	0.01872	5.72e-05	-8.36	2.47172	-0.379	TCEA1	transcription elongation factor A (SII), 1
226828_s_at	0.01426	3.73e-05	-8.92	2.86697	-0.38	HEYL	hes-related family bHLH transcription factor with YRPW motif-like
232080_at	0.01377	3.27e-05	-9.09	2.9859	-0.381	HECW2	HECT, C2 and WW domain containing E3 ubiquitin protein ligase 2
210106_at	0.0136	3.07e-05	-9.18	3.04458	-0.382	RDH5	retinol dehydrogenase 5 (11-cis/9-cis)
223316_at	0.01903	6e-05	-8.3	2.42667	-0.389	CCDC3	coiled-coil domain containing 3
212215_at	0.013	2.69e-05	-9.36	3.16519	-0.391	PREPL	prolyl endopeptidase-like
228608_at	0.01647	4.66e-05	-8.63	2.66282	-0.393	NALCN	sodium leak channel, non-selective
200632_s_at	0.01905	6.17e-05	-8.27	2.40111	-0.395	NDRG1	N-myc downstream regulated 1
200628_s_at	0.0136	2.98e-05	-9.22	3.07249	-0.397	WARS	tryptophanyl-tRNA synthetase
244183_x_at	0.01099	1.95e-05	-9.82	3.45118	-0.398	PCDHB3	protocadherin beta 3
209071_s_at	0.01405	3.6e-05	-8.97	2.90008	-0.41	RGS5	regulator of G-protein signaling 5
238996_x_at	0.0136	3.11e-05	-9.16	3.032	-0.411	ALDOA	aldolase A, fructose-bisphosphate
212686_at	0.01967	6.51e-05	-8.2	2.35031	-0.411	PPM1H	protein phosphatase, Mg2+/Mn2+ dependent, 1H
200637_s_at	0.01031	1.7e-05	-10	3.5737	-0.417	PTPRF	protein tyrosine phosphatase, receptor type, F
200878_at	0.01036	1.72e-05	-10	3.55962	-0.417	EPAS1	endothelial PAS domain protein 1
201673_s_at	0.013	2.68e-05	-9.37	3.16692	-0.421	GYS1	glycogen synthase 1 (muscle)
212174_at	0.01371	3.21e-05	-9.12	3.00433	-0.421	AK2	adenylate kinase 2
203813_s_at	0.01012	1.65e-05	-10.1	3.59979	-0.423	SLIT3	slit homolog 3 (Drosophila)
233533_at	0.01619	4.53e-05	-8.66	2.68784	-0.423	KRTAP1-5	keratin associated protein 1-5
212689_s_at	0.01111	2.05e-05	-9.75	3.40802	-0.43	KDM3A	lysine (K)-specific demethylase 3A
227198_at	0.01003	1.58e-05	-10.1	3.63718	-0.435	AFF3	AF4/FMR2 family, member 3
213992_at	0.01073	1.82e-05	-9.92	3.51219	-0.435	COL4A6	collagen, type IV, alpha 6
202499_s_at	0.0136	3.1e-05	-9.17	3.03598	-0.444	SLC2A3	solute carrier family 2 (facilitated glucose transporter), member 3
228937_at	0.01098	1.93e-05	-9.84	3.4615	-0.445	LACC1	laccase (multicopper oxidoreductase) domain containing 1
209598_at	0.01073	1.83e-05	-9.91	3.50958	-0.446	PNMA2	paraneoplastic Ma antigen 2
231120_x_at	0.01904	6.13e-05	-8.28	2.40712	-0.447	PKIB	protein kinase (cAMP-dependent, catalytic) inhibitor beta
225750_at	0.01426	3.72e-05	-8.92	2.86922	-0.449	ERO1L	ERO1-like (S. cerevisiae)
218651_s_at	0.0168	4.83e-05	-8.58	2.62977	-0.45	LARP6	La ribonucleoprotein domain family, member 6
204465_s_at	0.00783	8.48e-06	-11.1	4.16914	-0.451	INA	internexin neuronal intermediate filament protein, alpha
213332_at	0.01203	2.38e-05	-9.54	3.27537	-0.456	PAPPA2	pappalysin 2
223046_at	0.01505	4.07e-05	-8.8	2.78634	-0.456	EGLN1	egl-9 family hypoxia-inducible factor 1
228873_at	0.02026	6.89e-05	-8.13	2.29671	-0.457	COL22A1	collagen, type XXII, alpha 1
204194_at	0.00875	1.25e-05	-10.5	3.84103	-0.458	BACH1	BTB and CNC homology 1, basic leucine zipper transcription factor 1
209909_s_at	0.01405	3.49e-05	-9.01	2.92782	-0.46	TGFB2	transforming growth factor, beta 2
240167_at	0.0136	2.97e-05	-9.22	3.07352	-0.463	LINC01085	long intergenic non-protein coding RNA 1085
204595_s_at	0.01443	3.8e-05	-8.89	2.84969	-0.465	STC1	stanniocalcin 1
226106_at	0.00764	7.71e-06	-11.2	4.24872	-0.466	RNF141	ring finger protein 141
225283_at	0.01405	3.56e-05	-8.98	2.90973	-0.469	ARRDC4	arrestin domain containing 4
215189_at	0.00766	7.98e-06	-11.2	4.22024	-0.474	LOC100509764///KRT86	uncharacterized LOC100509764///keratin 86
204999_s_at	0.007	5.42e-06	-11.8	4.53918	-0.479	ATF5	activating transcription factor 5
213438_at	0.01003	1.6e-05	-10.1	3.62734	-0.483	NFASC	neurofascin
223059_s_at	0.00706	6.07e-06	-11.6	4.44736	-0.486	FAM107B	family with sequence similarity 107, member B
235737_at	0.01443	3.83e-05	-8.88	2.84369	-0.491	TSLP	thymic stromal lymphopoietin
217967_s_at	0.01647	4.67e-05	-8.62	2.66023	-0.491	FAM129A	family with sequence similarity 129, member A
221796_at	0.0136	3.07e-05	-9.18	3.04332	-0.498	NTRK2	neurotrophic tyrosine kinase, receptor, type 2
204347_at	0.00802	1.02e-05	-10.8	4.01126	-0.5	AK4	adenylate kinase 4
230147_at	0.007	5.7e-06	-11.7	4.49822	-0.504	F2RL2	coagulation factor II (thrombin) receptor-like 2
228121_at	0.00953	1.41e-05	-10.3	3.73454	-0.505	TGFB2	transforming growth factor, beta 2
238669_at	0.0136	2.85e-05	-9.28	3.11331	-0.507	PTGS1	prostaglandin-endoperoxide synthase 1 (prostaglandin G/H synthase and cyclooxygenase)
227145_at	0.01111	2.05e-05	-9.74	3.4055	-0.513	LOXL4	lysyl oxidase-like 4
222486_s_at	0.01664	4.75e-05	-8.6	2.64489	-0.514	ADAMTS1	ADAM metallopeptidase with thrombospondin type 1 motif, 1
207148_x_at	0.01903	6.01e-05	-8.3	2.42499	-0.516	MYOZ2	myozenin 2
204979_s_at	0.0079	9.29e-06	-10.9	4.09242	-0.518	SH3BGR	SH3 domain binding glutamate-rich protein
205236_x_at	0.01566	4.3e-05	-8.73	2.73728	-0.518	SOD3	superoxide dismutase 3, extracellular
229382_at	0.007	5.14e-06	-11.9	4.58281	-0.522	FAM212B	family with sequence similarity 212, member B
204597_x_at	0.00732	6.82e-06	-11.4	4.35063	-0.522	STC1	stanniocalcin 1
200737_at	0.00802	9.74e-06	-10.9	4.05268	-0.524	PGK1	phosphoglycerate kinase 1
230746_s_at	0.01791	5.37e-05	-8.44	2.52992	-0.524	LOC100288985	hypothetical protein LOC100288985
201250_s_at	0.00828	1.12e-05	-10.7	3.93388	-0.527	SLC2A1	solute carrier family 2 (facilitated glucose transporter), member 1
227068_at	0.00828	1.12e-05	-10.6	3.93275	-0.527	PGK1	phosphoglycerate kinase 1
200636_s_at	0.01128	2.15e-05	-9.68	3.3665	-0.527	PTPRF	protein tyrosine phosphatase, receptor type, F
206385_s_at	0.01218	2.43e-05	-9.5	3.25553	-0.53	ANK3	ankyrin 3, node of Ranvier (ankyrin G)
223058_at	0.01082	1.88e-05	-9.87	3.48308	-0.536	FAM107B	family with sequence similarity 107, member B
239218_at	0.01274	2.58e-05	-9.42	3.20237	-0.542	PDE1C	phosphodiesterase 1C, calmodulin-dependent 70kDa
212171_x_at	0.007	4.71e-06	-12.1	4.65374	-0.544	VEGFA	vascular endothelial growth factor A
202158_s_at	0.00599	3.16e-06	-12.8	4.96898	-0.545	CELF2	CUGBP, Elav-like family member 2
214265_at	0.00875	1.21e-05	-10.5	3.86561	-0.55	ITGA8	integrin, alpha 8
218353_at	0.0112	2.09e-05	-9.72	3.38948	-0.551	RGS5	regulator of G-protein signaling 5
213782_s_at	0.01469	3.92e-05	-8.85	2.82084	-0.564	MYOZ2	myozenin 2
202156_s_at	0.00802	1.02e-05	-10.8	4.00943	-0.566	CELF2	CUGBP, Elav-like family member 2
204933_s_at	0.01012	1.65e-05	-10.1	3.59956	-0.568	TNFRSF11B	tumor necrosis factor receptor superfamily, member 11b
201397_at	0.01111	2e-05	-9.78	3.42928	-0.568	PHGDH	phosphoglycerate dehydrogenase
202464_s_at	0.007	5.51e-06	-11.8	4.5256	-0.573	PFKFB3	6-phosphofructo-2-kinase/fructose-2,6-biphosphatase 3
202157_s_at	0.00599	2.91e-06	-12.9	5.03387	-0.575	CELF2	CUGBP, Elav-like family member 2
211959_at	0.0136	3.13e-05	-9.15	3.02553	-0.582	IGFBP5	insulin-like growth factor binding protein 5
223734_at	0.00485	1.95e-06	-13.7	5.33564	-0.587	MGARP	mitochondria-localized glutamic acid-rich protein
202934_at	0.00764	7.63e-06	-11.3	4.25782	-0.598	HK2	hexokinase 2
204348_s_at	0.00535	2.35e-06	-13.4	5.19684	-0.6	AK4	adenylate kinase 4
204284_at	0.0136	2.9e-05	-9.26	3.09646	-0.609	PPP1R3C	protein phosphatase 1, regulatory subunit 3C
201313_at	0.00288	8.42e-07	-15.5	5.93816	-0.639	ENO2	enolase 2 (gamma, neuronal)
204998_s_at	0.01111	2.02e-05	-9.76	3.41767	-0.639	ATF5	activating transcription factor 5
211958_at	0.00736	7e-06	-11.4	4.32921	-0.641	IGFBP5	insulin-like growth factor binding protein 5
202016_at	0.00764	7.64e-06	-11.3	4.25703	-0.648	MEST	mesoderm specific transcript
207345_at	0.00875	1.25e-05	-10.5	3.84266	-0.655	FST	follistatin
202887_s_at	0.007	4.81e-06	-12	4.63662	-0.662	DDIT4	DNA-damage-inducible transcript 4
227337_at	0.00599	3.01e-06	-12.9	5.00762	-0.664	ANKRD37	ankyrin repeat domain 37
209606_at	0.00611	3.68e-06	-12.5	4.84978	-0.667	CYTIP	cytohesin 1 interacting protein
204971_at	0.0136	3.05e-05	-9.19	3.04938	-0.671	CSTA	cystatin A (stefin A)
205984_at	0.00213	4.19e-07	-17.1	6.39753	-0.692	CRHBP	corticotropin releasing hormone binding protein
207543_s_at	0.00213	4.68e-07	-16.8	6.32793	-0.709	P4HA1	prolyl 4-hydroxylase, alpha polypeptide I
204681_s_at	0.007	4.91e-06	-12	4.61962	-0.714	RAPGEF5	Rap guanine nucleotide exchange factor (GEF) 5
210512_s_at	0.00441	1.65e-06	-14	5.45984	-0.724	VEGFA	vascular endothelial growth factor A
204948_s_at	0.00213	4.47e-07	-16.9	6.35633	-0.728	FST	follistatin
208096_s_at	0.01487	4e-05	-8.82	2.80317	-0.741	COL21A1	collagen, type XXI, alpha 1
205047_s_at	0.01618	4.48e-05	-8.67	2.69807	-0.749	ASNS	asparagine synthetase (glutamine-hydrolyzing)
220892_s_at	0.00487	2.05e-06	-13.6	5.30041	-0.751	PSAT1	phosphoserine aminotransferase 1
226847_at	0.01405	3.5e-05	-9	2.92627	-0.752	FST	follistatin
227623_at	0.0079	9.4e-06	-10.9	4.08322	-0.763	CACNA2D1	calcium channel, voltage-dependent, alpha 2/delta subunit 1
219934_s_at	0.00127	1.62e-07	-19.5	6.96369	-0.791	SULT1E1	sulfotransferase family 1E, estrogen-preferring, member 1
209822_s_at	0.0136	2.92e-05	-9.25	3.09113	-0.804	VLDLR	very low density lipoprotein receptor
210587_at	0.00376	1.24e-06	-14.6	5.66781	-0.833	INHBE	inhibin, beta E
222940_at	0.00441	1.7e-06	-14	5.4405	-0.839	SULT1E1	sulfotransferase family 1E, estrogen-preferring, member 1
218380_at	0.00127	1.43e-07	-19.9	7.03276	-0.84	LOC728392///NLRP1	uncharacterized LOC728392///NLR family, pyrin domain containing 1
201849_at	0.00127	1.29e-07	-20.1	7.08832	-0.841	BNIP3	BCL2/adenovirus E1B 19kDa interacting protein 3
225342_at	0.00127	1.14e-07	-20.5	7.15707	-0.843	AK4	adenylate kinase 4
221211_s_at	0.00213	4.2e-07	-17.1	6.39668	-0.853	MAP3K7CL	MAP3K7 C-terminal like
201848_s_at	0.00802	1.03e-05	-10.8	4.00812	-0.867	BNIP3	BCL2/adenovirus E1B 19kDa interacting protein 3
235666_at	0.0022	5.41e-07	-16.5	6.23399	-0.873	ITGA8	integrin, alpha 8
226452_at	0.00127	8.07e-08	-21.5	7.33454	-0.89	PDK1	pyruvate dehydrogenase kinase, isozyme 1
205475_at	0.00127	5.39e-08	-22.8	7.53182	-1.16	SCRG1	stimulator of chondrogenesis 1
218484_at	0.01377	3.3e-05	-9.08	2.97907	-1.2	NDUFA4L2	NADH dehydrogenase (ubiquinone) 1 alpha subcomplex, 4-like 2
