# Supplementary material for: Systems biological understanding of the regulatory network and the possible therapeutic strategies for vascular calcification
Source: Royal Society of Chemistry journal article supplement (doi:10.1039/c6mb00557h), 2016-10-05
Supplement: c6mb00557h3.xlsx [file c6mb00557h3.xlsx]

## Sheet: Sheet1
ID	adj.P.Val	P.Value	t	B	logFC	Gene.symbol	Gene.title
8120932	0.000522	4.7e-08	31.5	7.9616	4.41	PRSS35	protease, serine, 35
8098214	0.000639	7.93e-08	28.9	7.71415	3.81	TLL1	tolloid-like 1
7960828	0.000639	9.6e-08	28	7.61759	2.94	GDF3	growth differentiation factor 3
8068361	0.000522	3.15e-08	33.6	8.13522	2.45	SLC5A3	solute carrier family 5 (sodium/myo-inositol cotransporter), member 3
8150978	0.001628	4.89e-07	21.5	6.65623	2.43	CA8	carbonic anhydrase VIII
8161892	0.000985	2.07e-07	24.7	7.19462	2.37	GNA14	guanine nucleotide binding protein (G protein), alpha 14
8068353	0.000522	2.88e-08	34.1	8.17217	2.34	MRPS6///SLC5A3	mitochondrial ribosomal protein S6///solute carrier family 5 (sodium/myo-inositol cotransporter), member 3
7987066	0.003005	2.53e-06	16.4	5.44298	1.8
8006433	0.005791	1.35e-05	12.4	3.98958	1.63	CCL2	chemokine (C-C motif) ligand 2
8104663	0.003727	4.59e-06	14.9	4.94808	1.59	CDH6	cadherin 6, type 2, K-cadherin (fetal kidney)
8098242	0.001544	4.17e-07	22.1	6.76036	1.56
7925929	0.003518	3.7e-06	15.4	5.1303	1.55	AKR1C3	aldo-keto reductase family 1, member C3
8101728	0.001232	2.96e-07	23.3	6.97891	1.53	FAM13A	family with sequence similarity 13, member A
8072108	0.005791	1.29e-05	12.5	4.03038	1.5	ASPHD2	aspartate beta-hydroxylase domain containing 2
8096413	0.007362	3.02e-05	10.8	3.22986	1.49
7960771	0.000716	1.29e-07	26.7	7.46129	1.48	CD163L1	CD163 molecule-like 1
8057677	0.005533	9.39e-06	13.2	4.32039	1.47	SLC40A1	solute carrier family 40 (iron-regulated transporter), member 1
7896634	0.006183	1.82e-05	11.8	3.70914	1.45
8147891	0.003643	4.16e-06	15.1	5.03171	1.43	PKHD1L1	polycystic kidney and hepatic disease 1 (autosomal recessive)-like 1
7957458	0.007901	3.85e-05	10.4	2.99308	1.37	NTS	neurotensin
8068363	0.007367	3.2e-05	10.7	3.17325	1.33	LINC00310	long intergenic non-protein coding RNA 310
7916584	0.001943	9.31e-07	19.3	6.20798	1.26	TACSTD2	tumor-associated calcium signal transducer 2
7909681	0.003979	5.02e-06	14.6	4.87138	1.24	PROX1	prospero homeobox 1
8131666	0.005791	1.49e-05	12.2	3.90112	1.22	ITGB8	integrin, beta 8
8117018	0.004237	5.47e-06	14.4	4.79696	1.21
8141950	0.003116	2.81e-06	16.1	5.35765	1.2	RELN	reelin
7930320	0.003727	4.57e-06	14.9	4.95116	1.2	CFAP58	cilia and flagella associated protein 58
7962579	0.002863	2.06e-06	17	5.60503	1.18	AMIGO2	adhesion molecule with Ig-like domain 2
7922229	0.005791	1.3e-05	12.5	4.02219	1.18	SELE	selectin E
7953835	0.008072	4.29e-05	10.2	2.8876	1.17	KLRG1	killer cell lectin-like receptor subfamily G, member 1
7965206	0.005533	8.98e-06	13.3	4.36016	1.15	SLC6A15	solute carrier family 6 (neutral amino acid transporter), member 15
8150509	0.005932	1.7e-05	11.9	3.77468	1.15	PLAT	plasminogen activator, tissue
8058063	0.003561	3.85e-06	15.3	5.09658	1.13	RFTN2	raftlin family member 2
7965110	0.008491	5.12e-05	9.91	2.71205	1.13
8069676	0.005791	1.47e-05	12.2	3.90775	1.1	ADAMTS1	ADAM metallopeptidase with thrombospondin type 1 motif, 1
8097449	0.005533	9.62e-06	13.1	4.29839	1.09	PCDH10	protocadherin 10
8127854	0.005812	1.64e-05	12	3.80859	1.07	ME1	malic enzyme 1, NADP(+)-dependent, cytosolic
7968417	0.005078	7.47e-06	13.7	4.52436	1.06	FRY	furry homolog (Drosophila)
7987048	0.005791	1.39e-05	12.4	3.9658	1.06	MTMR10///FAN1	myotubularin related protein 10///FANCD2/FANCI-associated nuclease 1
7894231	0.002643	1.83e-06	17.3	5.70132	1.05
8089701	0.005791	1.4e-05	12.3	3.95633	1.05	ZBTB20	zinc finger and BTB domain containing 20
8149071	0.007182	2.72e-05	11	3.3305	1.04	ANGPT2	angiopoietin 2
8163618	0.00569	1.11e-05	12.8	4.16772	1.03	TNFSF15	tumor necrosis factor (ligand) superfamily, member 15
7936242	0.001943	1.03e-06	19	6.13249	1.01	ITPRIP	inositol 1,4,5-trisphosphate receptor interacting protein
8175492	0.007362	3.04e-05	10.8	3.22135	0.986	ATP11C	ATPase, class VI, type 11C
7940643	0.006522	2.02e-05	11.6	3.61439	0.984	ASRGL1	asparaginase like 1
8105300	0.008072	4.29e-05	10.2	2.88754	0.981
7893656	0.008072	4.29e-05	10.2	2.88726	0.98
8126093	0.005533	1.01e-05	13	4.25151	0.976
8078227	0.007362	3e-05	10.9	3.23593	0.954	KAT2B	K(lysine) acetyltransferase 2B
8014142	0.007106	2.55e-05	11.2	3.39322	0.95
8001800	0.004933	7.11e-06	13.8	4.56813	0.928	CDH11	cadherin 11, type 2, OB-cadherin (osteoblast)
7965541	0.007106	2.51e-05	11.2	3.40518	0.916	FGD6	FYVE, RhoGEF and PH domain containing 6
7896649	0.008491	5.04e-05	9.93	2.72738	0.914
8078286	0.007172	2.63e-05	11.1	3.36279	0.909	RARB	retinoic acid receptor, beta
8103106	0.007367	3.27e-05	10.7	3.15062	0.875	LRBA	LPS-responsive vesicle trafficking, beach and anchor containing
7893129	0.005812	1.6e-05	12.1	3.83379	0.864
8112107	0.003144	2.99e-06	16	5.30702	0.857	PPAP2A	phosphatidic acid phosphatase type 2A
8002941	0.007996	4.02e-05	10.3	2.95015	0.85	ADAMTS18	ADAM metallopeptidase with thrombospondin type 1 motif, 18
8064790	0.004311	5.83e-06	14.3	4.7416	0.842	RASSF2	Ras association (RalGDS/AF-6) domain family member 2
8142169	0.002991	2.43e-06	16.5	5.47623	0.839
8065124	0.007707	3.62e-05	10.5	3.05217	0.839	BFSP1	beaded filament structural protein 1, filensin
8167763	0.002623	1.66e-06	17.6	5.77748	0.824	TSPYL2	TSPY-like 2
8116835	0.007362	2.96e-05	10.9	3.24768	0.817	GCNT2	glucosaminyl (N-acetyl) transferase 2, I-branching enzyme (I blood group)
7957417	0.005791	1.48e-05	12.2	3.90203	0.813	TMTC2	transmembrane and tetratricopeptide repeat containing 2
8126086	0.008491	4.95e-05	9.96	2.74608	0.813	TMEM217	transmembrane protein 217
7965573	0.007972	3.93e-05	10.4	2.97381	0.802	NTN4	netrin 4
8073962	0.005812	1.64e-05	12	3.81045	0.8	MOV10L1	Mov10 RISC complex RNA helicase like 1
8159992	0.004311	5.96e-06	14.2	4.72353	0.788	ERMP1	endoplasmic reticulum metallopeptidase 1
8145766	0.006456	1.98e-05	11.6	3.63317	0.778	NRG1	neuregulin 1
8085867	0.008178	4.69e-05	10.1	2.79912	0.757	NEK10	NIMA-related kinase 10
7980316	0.007996	4.03e-05	10.3	2.94737	0.756	TGFB3	transforming growth factor, beta 3
7907160	0.008072	4.38e-05	10.2	2.86558	0.75	ATP1B1	ATPase, Na+/K+ transporting, beta 1 polypeptide
8022022	0.008032	4.09e-05	10.3	2.93347	0.749	LPIN2	lipin 2
8097288	0.008032	4.1e-05	10.3	2.93128	0.735	FAT4	FAT atypical cadherin 4
7912706	0.007064	2.42e-05	11.3	3.44217	0.722	EPHA2	EPH receptor A2
8141708	0.008072	4.2e-05	10.2	2.90746	0.694	CLDN15	claudin 15
7897774	0.006183	1.84e-05	11.8	3.70201	0.688	CLCN6	chloride channel, voltage-sensitive 6
8120215	0.007901	3.85e-05	10.4	2.99422	0.686	PAQR8	progestin and adipoQ receptor family member VIII
8081890	0.007362	2.97e-05	10.9	3.24652	0.68	PLA1A	phospholipase A1 member A
8087881	0.008072	4.46e-05	10.1	2.84945	0.663	MIRLET7G	microRNA let-7g
8050367	0.007367	3.26e-05	10.7	3.15584	0.629	NBAS	neuroblastoma amplified sequence
8173955	0.007367	3.13e-05	10.8	3.19442	0.628	SYTL4	synaptotagmin-like 4
8171297	0.006702	2.09e-05	11.5	3.57951	0.602	MID1	midline 1
7972021	0.008491	4.93e-05	9.97	2.75004	0.524	TBC1D4	TBC1 domain family, member 4
8064808	0.007265	2.88e-05	10.9	3.27467	0.522	SLC23A2	solute carrier family 23 (ascorbic acid transporter), member 2
8035628	0.008078	4.55e-05	-10.1	2.83	-0.477	NR2C2AP///RFXANK	nuclear receptor 2C2-associated protein///regulatory factor X-associated ankyrin-containing protein
7991216	0.007901	3.87e-05	-10.4	2.98857	-0.511	DET1	de-etiolated homolog 1 (Arabidopsis)
8121429	0.008072	4.23e-05	-10.2	2.89997	-0.515	FIG4	FIG4 phosphoinositide 5-phosphatase
8073858	0.008491	5.07e-05	-9.92	2.7217	-0.522	GTSE1	G-2 and S-phase expressed 1
8169009	0.008072	4.42e-05	-10.2	2.85874	-0.534	BEX4	brain expressed, X-linked 4
7916609	0.008072	4.46e-05	-10.1	2.84794	-0.55	JUN	jun proto-oncogene
7982326	0.007996	4.03e-05	-10.3	2.94827	-0.56	KLF13	Kruppel-like factor 13
7933821	0.008072	4.16e-05	-10.3	2.91777	-0.567	RHOBTB1	Rho-related BTB domain containing 1
7892962	0.007707	3.63e-05	-10.5	3.04946	-0.586
8085556	0.007265	2.87e-05	-10.9	3.27888	-0.595	SH3BP5	SH3-domain binding protein 5 (BTK-associated)
7905079	0.008491	5.1e-05	-9.91	2.71634	-0.604	HIST2H2AA4///HIST2H2AC///HIST2H2AA3	histone cluster 2, H2aa4///histone cluster 2, H2ac///histone cluster 2, H2aa3
7919619	0.008491	5.1e-05	-9.91	2.71634	-0.604	HIST2H2AA4///HIST2H2AC///HIST2H2AA3	histone cluster 2, H2aa4///histone cluster 2, H2ac///histone cluster 2, H2aa3
7909146	0.008491	5.1e-05	-9.91	2.71649	-0.606	FAM72A///FAM72D///FAM72B	family with sequence similarity 72, member A///family with sequence similarity 72, member D///family with sequence similarity 72, member B
8166632	0.008178	4.67e-05	-10.1	2.80422	-0.611	GK	glycerol kinase
7904452	0.007106	2.48e-05	-11.2	3.41716	-0.615	FAM72A///FAM72D///FAM72B	family with sequence similarity 72, member A///family with sequence similarity 72, member D///family with sequence similarity 72, member B
8066136	0.008072	4.45e-05	-10.1	2.85054	-0.619	RBL1	retinoblastoma-like 1
7913869	0.006456	1.97e-05	-11.6	3.63605	-0.621	STMN1	stathmin 1
8155192	0.007707	3.63e-05	-10.5	3.05126	-0.629	GLIPR2	GLI pathogenesis-related 2
8138489	0.005791	1.39e-05	-12.3	3.96066	-0.63	CDCA7L	cell division cycle associated 7-like
7994620	0.007362	3.05e-05	-10.8	3.21897	-0.633	KIF22	kinesin family member 22
7952601	0.005812	1.6e-05	-12.1	3.83346	-0.64	ETS1	v-ets avian erythroblastosis virus E26 oncogene homolog 1
7946569	0.006853	2.24e-05	-11.4	3.51374	-0.641	RNF141	ring finger protein 141
8064245	0.005932	1.71e-05	-11.9	3.7697	-0.648	TCEA2///TCEA2	transcription elongation factor A (SII), 2///transcription elongation factor A (SII), 2
8003583	0.007367	3.16e-05	-10.8	3.18663	-0.654	KIF22	kinesin family member 22
8040960	0.007367	3.27e-05	-10.7	3.15325	-0.656	GCKR	glucokinase (hexokinase 4) regulator
8062571	0.007901	3.86e-05	-10.4	2.9915	-0.661	FAM83D	family with sequence similarity 83, member D
7983306	0.008072	4.5e-05	-10.1	2.83938	-0.662	WDR76	WD repeat domain 76
7924058	0.008078	4.59e-05	-10.1	2.82159	-0.667	IRF6	interferon regulatory factor 6
8106986	0.008072	4.51e-05	-10.1	2.8381	-0.668	RHOBTB3	Rho-related BTB domain containing 3
7999387	0.007707	3.56e-05	-10.5	3.06845	-0.671	EMP2	epithelial membrane protein 2
7919591	0.005791	1.42e-05	-12.3	3.9455	-0.676	FAM72A///FAM72D	family with sequence similarity 72, member A///family with sequence similarity 72, member D
7930894	0.007367	3.26e-05	-10.7	3.1562	-0.679	GRK5	G protein-coupled receptor kinase 5
8136115	0.007064	2.41e-05	-11.3	3.44365	-0.681	STRIP2	striatin interacting protein 2
7905088	0.007996	3.99e-05	-10.3	2.95927	-0.688	HIST2H2AC	histone cluster 2, H2ac
8088803	0.005533	1e-05	-13	4.26085	-0.692	EIF4E3	eukaryotic translation initiation factor 4E family member 3
8149825	0.006996	2.35e-05	-11.3	3.4687	-0.695	STC1	stanniocalcin 1
7980233	0.005791	1.48e-05	-12.2	3.90714	-0.707	PGF	placental growth factor
7913237	0.007264	2.8e-05	-11	3.30151	-0.714	CAMK2N1	calcium/calmodulin-dependent protein kinase II inhibitor 1
8013671	0.00569	1.18e-05	-12.7	4.11376	-0.721	SPAG5///SPAG5	sperm associated antigen 5///sperm associated antigen 5
8012403	0.00569	1.14e-05	-12.8	4.14506	-0.729	AURKB	aurora kinase B
7996318	0.005791	1.47e-05	-12.2	3.91142	-0.734	CMTM3	CKLF-like MARVEL transmembrane domain containing 3
8122756	0.007455	3.34e-05	-10.7	3.13261	-0.742	PLEKHG1	pleckstrin homology domain containing, family G (with RhoGef domain) member 1
8114425	0.007182	2.71e-05	-11	3.33363	-0.75	CDC25C	cell division cycle 25C
8164644	0.007367	3.1e-05	-10.8	3.20377	-0.754	FAM78A	family with sequence similarity 78, member A
8083546	0.00641	1.93e-05	-11.7	3.65856	-0.761	KCNAB1	potassium voltage-gated channel, shaker-related subfamily, beta member 1
8153002	0.003098	2.7e-06	-16.2	5.38992	-0.766	NDRG1	N-myc downstream regulated 1
8043036	0.00569	1.13e-05	-12.8	4.15135	-0.788	LOC1720	dihydrofolate reductase pseudogene
8005475	0.005812	1.56e-05	-12.1	3.85429	-0.794	TRIM16L///TRIM16	tripartite motif containing 16-like///tripartite motif containing 16
8061471	0.007707	3.58e-05	-10.5	3.06369	-0.802	GINS1	GINS complex subunit 1 (Psf1 homolog)
7902227	0.007901	3.78e-05	-10.4	3.01002	-0.804	GADD45A	growth arrest and DNA-damage-inducible, alpha
8143781	0.007106	2.52e-05	-11.2	3.40188	-0.812	GIMAP6	GTPase, IMAP family member 6
7991406	0.00842	4.86e-05	-10	2.7652	-0.814	PRC1	protein regulator of cytokinesis 1
8112940	0.007707	3.53e-05	-10.6	3.07869	-0.816	SSBP2	single-stranded DNA binding protein 2
8097513	0.006996	2.32e-05	-11.3	3.48217	-0.819	MGST2	microsomal glutathione S-transferase 2
8155214	0.007106	2.56e-05	-11.1	3.38754	-0.825	MELK	maternal embryonic leucine zipper kinase
7950578	0.005485	8.4e-06	-13.4	4.42019	-0.829	PAK1	p21 protein (Cdc42/Rac)-activated kinase 1
7963157	0.006786	2.14e-05	-11.5	3.5586	-0.831	RACGAP1	Rac GTPase activating protein 1
8046488	0.005533	1.03e-05	-13	4.23663	-0.847	CDCA7	cell division cycle associated 7
8168146	0.00452	6.38e-06	-14.1	4.66343	-0.856	KIF4A	kinesin family member 4A
7902861	0.005533	9.68e-06	-13.1	4.29341	-0.859	LRRC8B	leucine rich repeat containing 8 family, member B
8124380	0.005812	1.61e-05	-12.1	3.82863	-0.861	HIST1H1A	histone cluster 1, H1a
8061579	0.007217	2.75e-05	-11	3.31829	-0.861	TPX2	TPX2, microtubule-associated
8117598	0.005533	9.49e-06	-13.2	4.31047	-0.866	HIST1H4J///HIST1H4K	histone cluster 1, H4j///histone cluster 1, H4k
7966878	0.005812	1.55e-05	-12.1	3.86327	-0.868	CIT	citron rho-interacting serine/threonine kinase
7896370	0.005236	7.86e-06	-13.6	4.4792	-0.87
8059838	0.005791	1.33e-05	-12.4	4.00298	-0.878	HJURP	Holliday junction recognition protein
8117589	0.008078	4.58e-05	-10.1	2.82359	-0.879	HIST1H3H	histone cluster 1, H3h
7919642	0.006996	2.35e-05	-11.3	3.46829	-0.887	HIST2H2AB	histone cluster 2, H2ab
8071420	0.005791	1.41e-05	-12.3	3.95182	-0.905	SERPIND1	serpin peptidase inhibitor, clade D (heparin cofactor), member 1
7937020	0.005791	1.51e-05	-12.2	3.88492	-0.909	MKI67	marker of proliferation Ki-67
8040712	0.002623	1.72e-06	-17.5	5.74838	-0.92	CENPA	centromere protein A
8117583	0.002975	2.23e-06	-16.7	5.54208	-0.928	HIST1H3H///HIST1H2AI	histone cluster 1, H3h///histone cluster 1, H2ai
8168794	0.005533	9.46e-06	-13.2	4.31367	-0.931	CENPI	centromere protein I
7894417	0.007182	2.71e-05	-11	3.33218	-0.936
8124521	0.003144	3.02e-06	-15.9	5.29757	-0.939	HIST1H4J///HIST1H4K	histone cluster 1, H4j///histone cluster 1, H4k
7989647	0.007182	2.68e-05	-11.1	3.34294	-0.948	KIAA0101	KIAA0101
8109093	0.001943	1.04e-06	-19	6.12455	-0.958	ABLIM3	actin binding LIM protein family, member 3
8124416	0.005533	1.02e-05	-13	4.2423	-0.962	HIST1H3D///HIST1H2AD	histone cluster 1, H3d///histone cluster 1, H2ad
8124437	0.001943	1.11e-06	-18.8	6.0805	-0.969	HIST1H3F	histone cluster 1, H3f
7927710	0.008072	4.32e-05	-10.2	2.88068	-0.969	CDK1	cyclin-dependent kinase 1
8145555	0.005533	9.85e-06	-13.1	4.27707	-0.97	SCARA3	scavenger receptor class A, member 3
8058273	0.002623	1.73e-06	-17.5	5.74172	-0.978	MPP4	membrane protein, palmitoylated 4 (MAGUK p55 subfamily member 4)
8008784	0.007106	2.5e-05	-11.2	3.41125	-0.986	PRR11	proline rich 11
7994109	0.007367	3.16e-05	-10.8	3.1839	-0.989	PLK1	polo-like kinase 1
7946579	0.008072	4.3e-05	-10.2	2.88409	-1	LYVE1	lymphatic vessel endothelial hyaluronan receptor 1
8054479	0.003271	3.24e-06	-15.7	5.23967	-1.02	MALL	mal, T-cell differentiation protein-like
8105828	0.005791	1.51e-05	-12.2	3.88395	-1.02	CCNB1	cyclin B1
8034772	0.007265	2.85e-05	-10.9	3.28399	-1.02	ASF1B	anti-silencing function 1B histone chaperone
8137244	0.003569	3.97e-06	-15.2	5.07148	-1.03	GIMAP4	GTPase, IMAP family member 4
8117426	0.007697	3.49e-05	-10.6	3.08867	-1.05	HIST1H2BH	histone cluster 1, H2bh
8056572	0.006794	2.2e-05	-11.4	3.53072	-1.06	SPC25	SPC25, NDC80 kinetochore complex component
8108301	0.00569	1.17e-05	-12.7	4.11886	-1.07	KIF20A///CDC23	kinesin family member 20A///cell division cycle 23
7974404	0.007264	2.81e-05	-11	3.29693	-1.07	CDKN3	cyclin-dependent kinase inhibitor 3
8124440	0.008072	4.36e-05	-10.2	2.8711	-1.12	HIST1H3G	histone cluster 1, H3g
7950162	0.00715	2.6e-05	-11.1	3.37369	-1.14	PDE2A	phosphodiesterase 2A, cGMP-stimulated
8124388	0.001943	1.06e-06	-18.9	6.11207	-1.15	HIST1H3B	histone cluster 1, H3b
8124413	0.002991	2.42e-06	-16.5	5.4763	-1.15	HIST1H4D	histone cluster 1, H4d
8054580	0.006794	2.2e-05	-11.4	3.53201	-1.15	BUB1	BUB1 mitotic checkpoint serine/threonine kinase
8102643	0.007367	3.16e-05	-10.8	3.18592	-1.15	CCNA2	cyclin A2
8099850	0.00569	1.15e-05	-12.8	4.13908	-1.17	TMEM156	transmembrane protein 156
8021187	0.001943	7.56e-07	-20	6.35741	-1.22	SKA1	spindle and kinetochore associated complex subunit 1
8124524	0.005791	1.23e-05	-12.6	4.07678	-1.24	HIST1H2AK	histone cluster 1, H2ak
8124534	0.004311	5.82e-06	-14.3	4.74354	-1.25	HIST1H4L	histone cluster 1, H4l
8036710	0.007901	3.78e-05	-10.4	3.01213	-1.35	GMFG	glia maturation factor, gamma
7904726	0.007574	3.41e-05	-10.6	3.11078	-1.36	TXNIP	thioredoxin interacting protein
8124527	0.001943	8.36e-07	-19.7	6.28585	-1.39	HIST1H1B	histone cluster 1, H1b
8126798	0.006183	1.82e-05	-11.8	3.7119	-1.4	GPR116	G protein-coupled receptor 116
8117408	0.001943	1.08e-06	-18.9	6.09965	-1.42	HIST1H2AE	histone cluster 1, H2ae
7979133	0.003727	4.49e-06	-14.9	4.9673	-1.43	NID2	nidogen 2 (osteonidogen)
8021635	0.00569	1.14e-05	-12.8	4.14645	-1.47	SERPINB2	serpin peptidase inhibitor, clade B (ovalbumin), member 2
8066822	0.003518	3.68e-06	-15.4	5.13518	-1.54	SULF2	sulfatase 2
8117594	0.005791	1.34e-05	-12.4	3.99643	-1.57	HIST1H2BM	histone cluster 1, H2bm
7933204	0.006794	2.2e-05	-11.4	3.53074	-1.66	C10orf10	chromosome 10 open reading frame 10
7922474	0.001943	8.12e-07	-19.8	6.30668	-1.81	KIAA0040	KIAA0040
