# Supplementary material for: Systems biological understanding of the regulatory network and the possible therapeutic strategies for vascular calcification
Source: Royal Society of Chemistry journal article supplement (doi:10.1039/c6mb00557h), 2016-10-05
Supplement: c6mb00557h4.pdf [file c6mb00557h4.pdf]

**Table S3. Complete list of interacting herbal ingredients with important targets**

| Upstream targets |        |                                                                                                                                                                                                                                                                                                                                                                                                                                                                                                                                                                                                                                                                                                                                                                                                                                                                                                                                                                                 |
|------------------|--------|---------------------------------------------------------------------------------------------------------------------------------------------------------------------------------------------------------------------------------------------------------------------------------------------------------------------------------------------------------------------------------------------------------------------------------------------------------------------------------------------------------------------------------------------------------------------------------------------------------------------------------------------------------------------------------------------------------------------------------------------------------------------------------------------------------------------------------------------------------------------------------------------------------------------------------------------------------------------------------|
| S.No             | Target | Related herbal Ingredients                                                                                                                                                                                                                                                                                                                                                                                                                                                                                                                                                                                                                                                                                                                                                                                                                                                                                                                                                      |
| 1                | HIPK2  | NA                                                                                                                                                                                                                                                                                                                                                                                                                                                                                                                                                                                                                                                                                                                                                                                                                                                                                                                                                                              |
| 2                | MAPK14 | 12-o-tetradecanoylphorbol-13-acetate taxol rottlerin mallotoxin aesculetin<br>esculetin genistein curcumin curcumine piceatannol cinnamaldehyde cinna<br>mic aldehyde trans-cinnamaldehyde hyperoxide resveratrol trans-<br>resveratrol arachidonic acid quinazolinone 4-<br>methoxyhonokiol epigallocatechin 3-gallate coleonol forskolin 12-<br>tetradecanoylphorbol 13-acetate manganese taurodeoxycholic<br>acid emetine 2-propenal rotenone adenosine diphosphate adenosine<br>triphosphate sorbitol 17-beta-estradiol estradiol alpha-estradiol beta-<br>estradiol 17beta-oestradiol 3,4-benzopyrenemagnesium lipoic acid alpha-<br>lipoic acid glycerol formaldehyde ketone 3,4,5-trihydroxybenzoic<br>acid gallic acid                                                                                                                                                                                                                                                  |
| 3                | CDK2   | ginsenoside rh2 gnidimacrin isosilybin b silymarin ceramide isosilybin<br>aaristololactam a<br>iiiia indirubin isoindigo daidzein baicalein genistein vitamin d<br>vitamin d3 luteolin quercetin eupatilin piceatannol apicidin (+)-<br>arteannuinartemisinin resveratrol trans-resveratrol tetrandrine hanfangchin<br>a epigallocatechin 3-gallate silybin camptothecin manganese perillyl<br>alcohol perilla alcohol 4-(1-methylethenyl)-1-cyclohexene-1-<br>methanol citrulline camp adenosine diphosphateandrogen adenosine<br>triphosphate thymidine mimosine purine magnesiumglycerol formic<br>acid fatty acids butanoic acid butyric acid ethyl<br>aldehydeacetaldehyde arachidonic acid 18alpha-glycyrrhetic<br>acid licochalcone a panaxydolursolic acid 15,16-dihydrotanshinone<br>i fisetin (-)-epigallocatechin-3-<br>gallate esculetinsilydianin heparin tangeretin catechin berberine aloe-<br>emodin saponincaffeine geraniol apigenin progesterone aldosterone |
| 4                | ATM    | silybin camptothecin iron adenosine<br>diphosphate testosterone androgenadenosine triphosphate 17-beta-<br>estradiol estradiol alpha-estradiol beta-estradiol17beta-<br>oestradiol serotonin serotoninine caffeine genistein vitamin c                                                                                                                                                                                                                                                                                                                                                                                                                                                                                                                                                                                                                                                                                                                                          |
| 5                | MAPK1  | ceramide phosphatidylinositol 12-o-tetradecanoylphorbol-13-<br>acetate bufalin seselenium arsenicum glycitein rottlerin mallotoxin daidzei<br>n baicaleinamentoflavone aesculetin esculetin genistein kaempferol luteoli<br>n quercetincapsaicin cinnamaldehyde cinnamic aldehyde trans-                                                                                                                                                                                                                                                                                                                                                                                                                                                                                                                                                                                                                                                                                        |

|    |         |                                                                                                                                                                                                                                                                                                                                                                                                                                                                                                                                                                                                                                                                                                                                                                                                                                                                                                                                                                                                                                                                                                                                                                                                                                                                          |
|----|---------|--------------------------------------------------------------------------------------------------------------------------------------------------------------------------------------------------------------------------------------------------------------------------------------------------------------------------------------------------------------------------------------------------------------------------------------------------------------------------------------------------------------------------------------------------------------------------------------------------------------------------------------------------------------------------------------------------------------------------------------------------------------------------------------------------------------------------------------------------------------------------------------------------------------------------------------------------------------------------------------------------------------------------------------------------------------------------------------------------------------------------------------------------------------------------------------------------------------------------------------------------------------------------|
|    |         | <p>cinnamaldehyde thapsigarginferulic acid resveratrol trans-resveratrol arachidonic acid hyperforin g-strophanthin vitamin u 7alpha-hydroxycholesterol picropodophyllin malvidinbetulic acid betulinic acid adenosine adenosin coleonol forskolin 12-tetradecanoylphorbol 13-acetate zinc manganese helenalin beta-phenylethyl isothiocyanate dihydrotestosterone (+)-catechin catechin d-catechin 2-propenalphenylalanine camp folic acid adenosine diphosphate progesterone adenosine triphosphate 3,5,3'-triiodothyronine aldosterone glucose 17-beta-estradiol estradiolalpha-estradiol beta-estradiol 17beta-oestradiol serotonin serotonin quinonefluoxetine chelerythrine 3,4-benzopyrene atrazine phytin phytic acidhydroquinone p-dihydroxybenzene ethanol alcohol dopamine calciumacetylcholine ethyl aldehyde acetaldehyde gossypin deoxypodophyllotoxinnicotine rosmarinic acid pectin naringenin berberine salvianolic acid b rotenoneandrographolide irisolidone rhapontigenin vitamin a curcumin morphinedelta(9)-tetrahydrocannabinol gallic acid paeonol beta-hydroxyisovalerylshikonin caffeine vitamin e (-)-epigallocatechin-3-gallate melanin alpha-amyrin evodiaminephosphatidic acid delphinidin licochalcone a costunolide vanillin cocaine</p> |
| 6  | ATR     | silicon atropine copper chloride atractyloside copper cuprum 2-methylbutanoic acid styrene acrylic acid glycol                                                                                                                                                                                                                                                                                                                                                                                                                                                                                                                                                                                                                                                                                                                                                                                                                                                                                                                                                                                                                                                                                                                                                           |
| 7  | WEE1    | flavokawain a resveratrol trans-resveratrol adenosine diphosphate adenosine triphosphate magnesium glycerol berberine                                                                                                                                                                                                                                                                                                                                                                                                                                                                                                                                                                                                                                                                                                                                                                                                                                                                                                                                                                                                                                                                                                                                                    |
| 8  | MAP3K1  | 12-o-tetradecanoylphorbol-13-acetate curcumin curcumine epigallocatechin 3-gallate7-epitaxol 12-tetradecanoylphorbol 13-acetate taxol (-)-epigallocatechin-3-gallate                                                                                                                                                                                                                                                                                                                                                                                                                                                                                                                                                                                                                                                                                                                                                                                                                                                                                                                                                                                                                                                                                                     |
| 9  | ABL1    | rottlerin mallotoxin myristic acid tetradecanoic acid adenosine diphosphateadenosine triphosphate sodium chloride magnesium glycerol                                                                                                                                                                                                                                                                                                                                                                                                                                                                                                                                                                                                                                                                                                                                                                                                                                                                                                                                                                                                                                                                                                                                     |
| 10 | CSNK2A1 | ellagic acid daidzein apigenin quercetin resveratrol trans-resveratrol zincheparin adenosine diphosphate emodin spermine spermidine glycerol 1-butanol                                                                                                                                                                                                                                                                                                                                                                                                                                                                                                                                                                                                                                                                                                                                                                                                                                                                                                                                                                                                                                                                                                                   |
| 11 | AKT1    | ceramide phosphatidylinositol 12-o-tetradecanoylphorbol-13-acetate 120tauroursodeoxycholic acid gambogic acid se selenium parthenolide taxolgamma-tocotrienol rottlerin mallotoxin psoralidin orientin myricetin 3,3',4',5,5',7-hexahydroxyflavone isorhamnetin 3-methylquercetin chrysin baicalein genisteinvitamin d vitamin d3 linoleic acid (z,z)-9,12-octadecadienoic                                                                                                                                                                                                                                                                                                                                                                                                                                                                                                                                                                                                                                                                                                                                                                                                                                                                                               |

|                           |        |                                                                                                                                                                                                                                                                                                                                                                                                                                                                                                                                                                                                                                                                                                                                                                                                                                                                                                                                                                                                                                                                                                                                                                                                                                                                                                                                                                                                                                                                                                                                                                                                                                                                                                     |
|---------------------------|--------|-----------------------------------------------------------------------------------------------------------------------------------------------------------------------------------------------------------------------------------------------------------------------------------------------------------------------------------------------------------------------------------------------------------------------------------------------------------------------------------------------------------------------------------------------------------------------------------------------------------------------------------------------------------------------------------------------------------------------------------------------------------------------------------------------------------------------------------------------------------------------------------------------------------------------------------------------------------------------------------------------------------------------------------------------------------------------------------------------------------------------------------------------------------------------------------------------------------------------------------------------------------------------------------------------------------------------------------------------------------------------------------------------------------------------------------------------------------------------------------------------------------------------------------------------------------------------------------------------------------------------------------------------------------------------------------------------------|
|                           |        | <p>acid luteolin apigeninquercetin cerebroside capsaicin curcumin curcumine piceatannol flavin mononucleotide flavin adenine dinucleotide hyperoxide phosphatidic acid lycopenethapsigargin resveratrol trans-resveratrol g-strophanthin naringenin withaferin atanshinone iia tanshinone ii tanshinone ii</p> <p>a leonurine evodiamine isoevodiaminecelastrol tripterine triptolide degueli n diosgenin butin nicotine diallyl tetrasulfide tetrandrine hanfangchin a picropodophyllin isoflavone honokioldelphinidin artesunate epigallocatechin 3-gallate betulic acid betulinic acid ursolic acid coleonol forskolin 7-epitaxol oridonin silybin tomatine 12-tetradecanoylphorbol 13-acetate camptothecin zinc copper cuprum manganesehelenalin allitridin di allyl trisulfide citrulline novobiocin guanosine rotenonel-arginine arginine camp adenosine diphosphate testosterone cholesterolandrogen progesterone adenosine triphosphate 3,5,3'-triiodothyronine coenzyme iiadrenaline 17-beta-estradiol estradiol alpha-estradiol beta-estradiol 17beta-oestradiol serotonin serotonine lauric acid dodecanoic acid chelerythrine caffeine3,4-benzopyrene atrazine acetovanillone apocynin palmitic acid fat hexadecanoic acid hexadecylic acid melatonin phytin phytic acid heteroauxin guaneglycerol ethanol alcohol 3,4,5-trihydroxybenzoic acid gallic acid calciumagmatine ethyl aldehyde acetaldehyde isobutyrylshikonin salvianolic acid ashikonin eupatilin brazilin (-)-epicatechin fisetin paeonol beta-carotenekaempferol selenocystine vitamin e wogonin icariin (-)-epigallocatechin-3-gallatepuerarin cardamomin sorbitol tylophorine andrographolide b-group soyasaponin</p> |
| 12                        | TRIM28 | zinc                                                                                                                                                                                                                                                                                                                                                                                                                                                                                                                                                                                                                                                                                                                                                                                                                                                                                                                                                                                                                                                                                                                                                                                                                                                                                                                                                                                                                                                                                                                                                                                                                                                                                                |
| 13                        | PRKACA | l20 cgmp myristic acid tetradecanoic acid pentanal camp n-octane calcium                                                                                                                                                                                                                                                                                                                                                                                                                                                                                                                                                                                                                                                                                                                                                                                                                                                                                                                                                                                                                                                                                                                                                                                                                                                                                                                                                                                                                                                                                                                                                                                                                            |
| 14                        | TAF1   | NA                                                                                                                                                                                                                                                                                                                                                                                                                                                                                                                                                                                                                                                                                                                                                                                                                                                                                                                                                                                                                                                                                                                                                                                                                                                                                                                                                                                                                                                                                                                                                                                                                                                                                                  |
| <b>Downstream targets</b> |        |                                                                                                                                                                                                                                                                                                                                                                                                                                                                                                                                                                                                                                                                                                                                                                                                                                                                                                                                                                                                                                                                                                                                                                                                                                                                                                                                                                                                                                                                                                                                                                                                                                                                                                     |
| 1                         | SELE   | <p>anemoside b4 jatrorrhizine muscarine heparin colchicine berberine calciumnotoginsen oside r1 quercetin silymarin yakuchinone b curcumin genistein 17-beta-estradiol isoliquiritigenin kaempferol vitamin e vitamin k ursolic acidnicotine resveratrol</p>                                                                                                                                                                                                                                                                                                                                                                                                                                                                                                                                                                                                                                                                                                                                                                                                                                                                                                                                                                                                                                                                                                                                                                                                                                                                                                                                                                                                                                        |

|   |        |                                                                                                                                 |
|---|--------|---------------------------------------------------------------------------------------------------------------------------------|
| 2 | ANGPT2 | n-acetyl-d-glucosamine 2-acetamido-2-deoxy-d-glucose calcium                                                                    |
| 3 | EPHA2  | n-acetyl-d-glucosamine 2-acetamido-2-deoxy-d-glucose adenosine diphosphateadenosine triphosphate (-)-epigallocatechin-3-gallate |
| 4 | LUM    | NA                                                                                                                              |

TCMID prediction of interaction between natural ingredients and major targets through text mining and STITCH. NA-Not available
