# Supplementary figures and images for: Systems biological understanding of the regulatory network and the possible therapeutic strategies for vascular calcification
Source: Royal Society of Chemistry journal article supplement (doi:10.1039/c6mb00557h), 2016-10-05

### VSMC

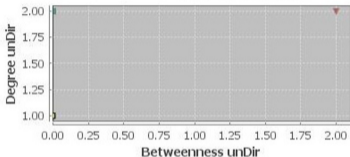

### EC

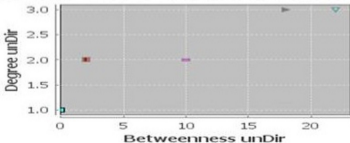

Supplement: c6mb00557h1.pdf [file c6mb00557h1.pdf]
